# Supplementary material
Source: PubMed Central journal article supplement (PMC9045906)
Supplement: boe-13-4-1995-s001.pdf [file boe-13-4-1995-s001.pdf]

## Noninvasive assessment of liver function reserve with fluorescent dosimetry of indocyanine green: supplement

PEI-CHUN WU,<sup>1,2,3,14</sup> LUN-ZHANG GUO,<sup>2,14</sup> SHAN YU,<sup>1,4,14</sup> NING ZENG,<sup>5,6,14</sup> YU-CHENG LIU,<sup>1</sup> JIA YU,<sup>1</sup> ZHIMING ZHANG,<sup>1</sup> KE LU,<sup>1</sup> LIANGYU SUN,<sup>1</sup> CHUNFEI WANG,<sup>1</sup> YU-HAN CHANG,<sup>2,3</sup> YIN-LIN LU,<sup>1,3</sup> YU-FANG SHEN,<sup>7,8</sup> SHENG TAI,<sup>9</sup> YUEH-HSUN CHUANG,<sup>10</sup> JA-AN ANNIE HO,<sup>11</sup> KAI-WEN HUANG,<sup>12</sup> YAO-MING WU,<sup>13</sup> AND TZU-MING LIU<sup>1,\*</sup>

<sup>1</sup>*Institute of Translational Medicine, Faculty of Health Sciences & Ministry of Education Frontiers Science Center for Precision Oncology, University of Macau, Taipa, Macau, China*

<sup>2</sup>*Department of Biomedical Engineering, National Taiwan University, Taipei 10617, Taiwan*

<sup>3</sup>*Molecular Imaging Center, National Taiwan University, Taipei 10617, Taiwan*

<sup>4</sup>*Department of Pathology, The Secondary Affiliated Hospital of Harbin Medical University, Harbin 150080, China*

<sup>5</sup>*First Department of Hepatobiliary Surgery, Zhujiang Hospital, Southern Medical University, Guangzhou 510280, China*

<sup>6</sup>*Guangdong Provincial Clinical and Engineering Technology Center of Digital Medicine, Guangzhou 510280, China*

<sup>7</sup>*3D Printing Medical Research Institute, Asia University, Taichung 41354, Taiwan*

<sup>8</sup>*Department of Bioinformatics and Medical Engineering, Asia University, Taichung 41354, Taiwan*

<sup>9</sup>*Department of Hepatopancreatobiliary Surgery, The Secondary Affiliated Hospital of Harbin Medical University, Harbin 150080, China*

<sup>10</sup>*Department of Anesthesiology, National Taiwan University Hospital, Taipei 10002, Taiwan*

<sup>11</sup>*Bioanalytical Chemistry and Nanobiomedicine Laboratory, Department of Biochemical Science & Technology, National Taiwan University, Taipei 10617, Taiwan*

<sup>12</sup>*Graduate Institute of Clinical Medicine, National Taiwan University College of Medicine, Taipei 10002, Taiwan*

<sup>13</sup>*Department of Surgery, National Taiwan University Hospital and College of Medicine, Taipei 10002, Taiwan*

<sup>14</sup>*Contributed equally*

\* [tmliu@um.edu.mo](mailto:tmliu@um.edu.mo)

This supplement published with Optica Publishing Group on 10 March 2022 by The Authors under the terms of the [Creative Commons Attribution 4.0 License](https://creativecommons.org/licenses/by/4.0/) in the format provided by the authors and unedited. Further distribution of this work must maintain attribution to the author(s) and the published article's title, journal citation, and DOI.

Supplement DOI: <https://doi.org/10.6084/m9.figshare.19173923>

Parent Article DOI: <https://doi.org/10.1364/BOE.446749>

# Noninvasive Assessment of Liver Function Reserve with Fluorescent Dosimetry of Indocyanine Green

Table S1. Quantification of serum biomarkers related to the liver function of rats

|                        | Control Group | Rat 1 | Rat 2 | Rat 3 |
|------------------------|---------------|-------|-------|-------|
| Albumin (g/dL)         | 4.1           | 3.9   | 4     | 3.75  |
| Total bilirubin(mg/dL) | 0.4           | 0.27  | 0.4   | 0.6   |
| GPT (U/L)              | 58.5          | 60.3  | 96    | 129   |
| GOT (U/L)              | 85.5          | 89    | 247   | 265   |

Table S2. Fitting parameters of curves in Fig. 3(b) and 3(c).

|         | Y-axis intercept $Y_0$ | Amplitude $A$ | Decay time $\tau$ (minute) |
|---------|------------------------|---------------|----------------------------|
| Control | 0                      | 99.967        | 4.460                      |
| Rat 1   | 5.959                  | 94.093        | 3.816                      |
| Rat 2   | 1.078                  | 98.920        | 4.452                      |
| Rat 3   | 1.716                  | 98.193        | 13.898                     |

Table S3. Fitting parameters of curves in Fig. 4.

|                   | Y-axis intercept $Y_0$ | Amplitude $A$ | Decay time $\tau$ (minute) |
|-------------------|------------------------|---------------|----------------------------|
| 1x(black curve)   | 0.020                  | 0.980         | 4.645                      |
| 1x(red curve)     | 0.011                  | 0.986         | 4.554                      |
| 0.1x(black curve) | 0.000                  | 0.999         | 4.973                      |
| 0.1x(red curve)   | 0.000                  | 1.000         | 4.438                      |
| 0.1x(blue curve)  | 0.010                  | 0.990         | 4.865                      |

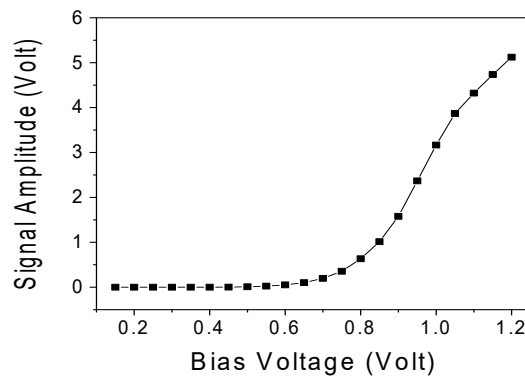

Fig. S1. Bias-dependent background signals of PBS buffer. The excitation power of the 785 nm laser was 50 mW.

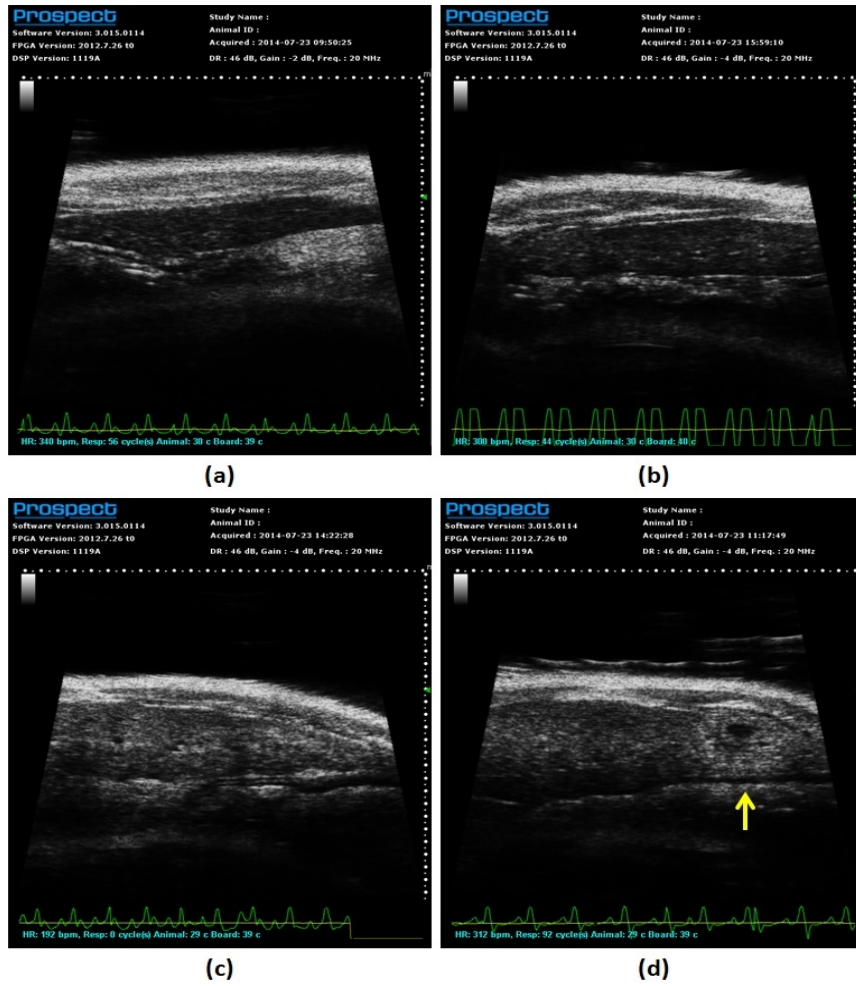

**Fig. S2.** High-frequency ultrasound images of livers in (a) Control rat (b) Rat 1 (c) Rat 2 (d) Rat 3. The yellow arrow indicates the tumor area.

Liver Lesion Confirmed by H&E and Masson Staining

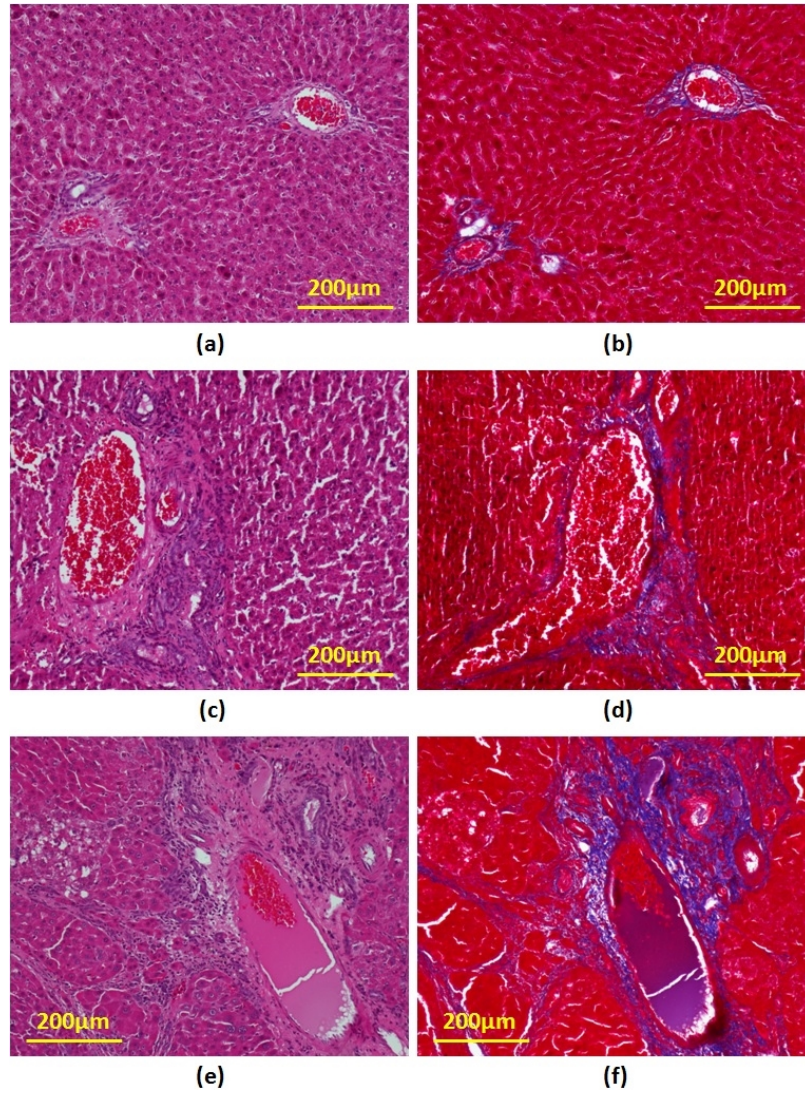

**Fig. S3.** A representative comparison of the portal zone in different groups. (a,b) Control, (c,d) Rat 1, (e,f) Rat 3. (a,c,e) H&E staining; (b,d,f) Masson Staining.



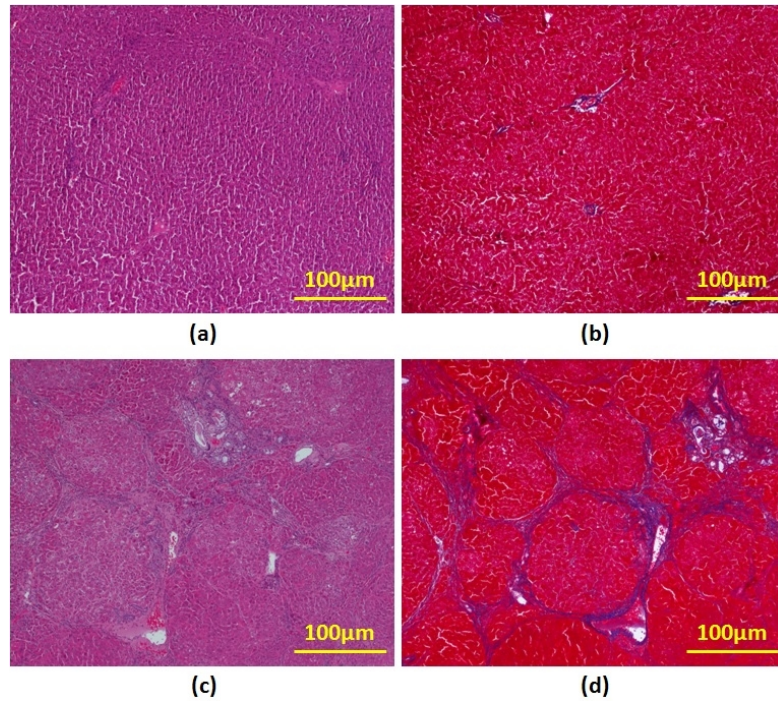

**Fig. S4.** Representative liver staining pictures. (a,c) H&E staining; (b,d) Masson staining. (a,b) Rat 1 shows no significant lesion in the liver. (c,d) Rat 3 shows architectural distortion (septal fibrosis, bridging) and pseudolobules formation.

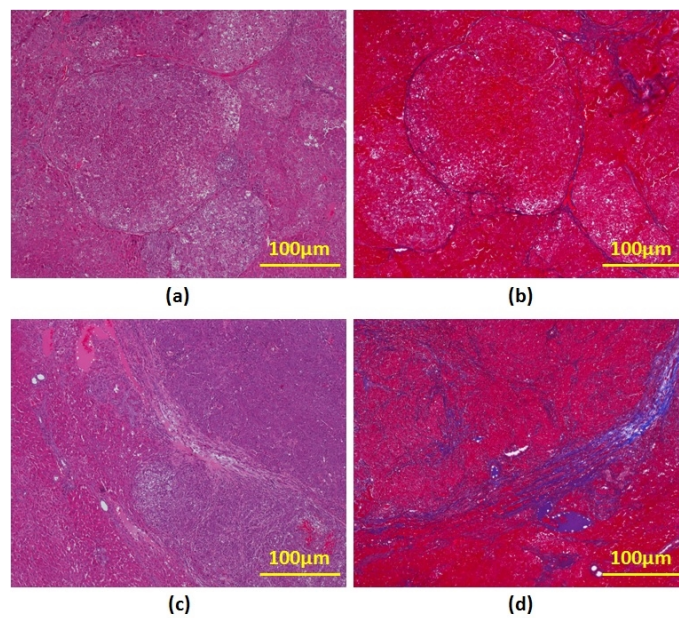

**Fig. S5.** Rat 2's liver sections. (a,b) H&E and Masson staining show that the tumor region lacks collagen structure and fibrous septa separating thick plates (c,d) Non-tumor region shows regenerated hepatocytes with a dark purple in H&E staining. Masson staining pattern is different from cirrhosis area, but fibrosis is widely present.

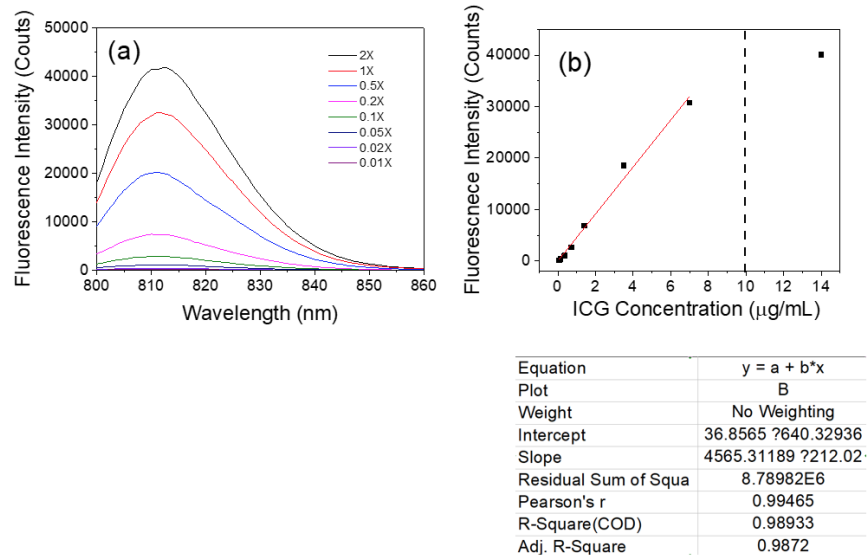

**Fig. S6.** (a) Single-photon fluorescence spectrum of ICG at different clinical dosages. ( $\lambda_{exc}$ =785 nm,  $1 \times$  dosage = 12.7  $\mu\text{g/mL}$ ); (b) The ICG fluorescence intensities at various concentrations. The 14  $\mu\text{g/mL}$  already showed saturation effect and was not included in the data's linear fitting (red line). The table below shows the fitting results.

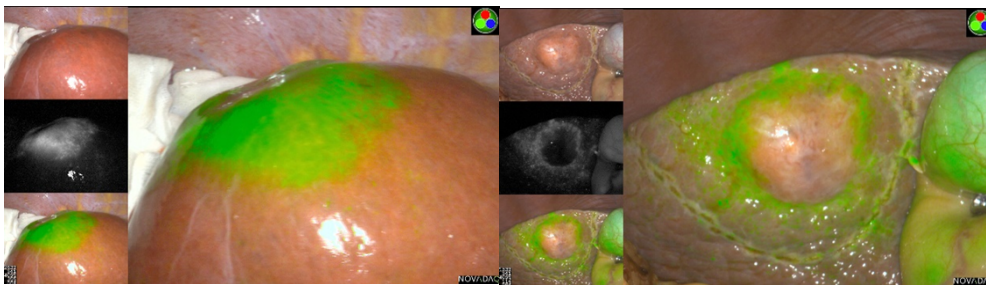

**Fig. S7.** The bright-field color images (top), ICG fluorescence images (middle), and combined images (bottom, green color represent ICG) of human HCC tissues (enlarged view to the right). After ICG-R15 testing, the well-differentiated HCC (Left image set) showed a cholestasis-like accumulation, while the poor-differentiated HCC (Right) showed a ring around the tumor site.
